# Supplementary material
Source: PubMed Central journal article supplement (PMC3226903)
Supplement: NIHMS330527-supplement-1_si_001.pdf [file NIHMS330527-supplement-1_si_001.pdf]

## Supporting Information

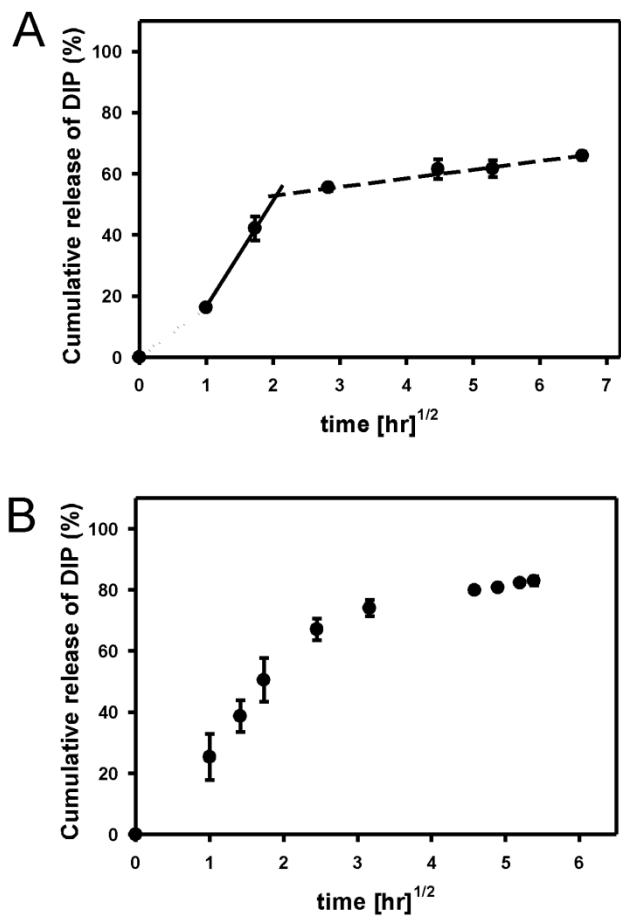

**Figure S1.** DIP release as a function of square root of time for A) elastin-mimetic micelle containing long hydrophobic block, [Tyr]<sub>15</sub> and B) short hydrophobic block, [Tyr]<sub>12</sub>.

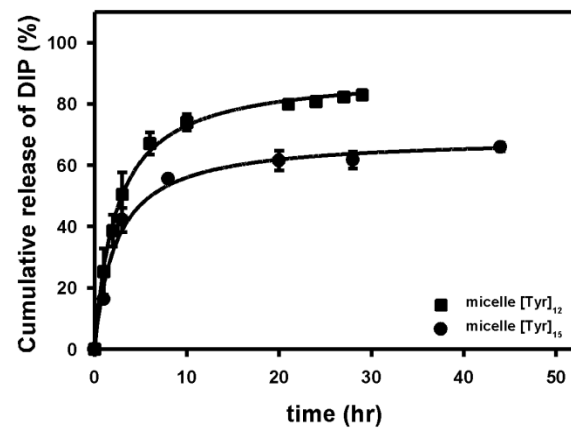

**Figure S2.** Release of dipyridamole from elastin-mimetic micelles with short hydrophobic block, [Tyr]<sub>12</sub>, (■), and long hydrophobic block [Tyr]<sub>15</sub>, (●).
